# Supplementary material for: Rational Extension of the Ribosome Biogenesis Pathway Using Network-Guided Genetics
Source: PubMed Central journal article supplement (PMC2749941; doi:10.1371/journal.pbio.1000213), 2009-10-06

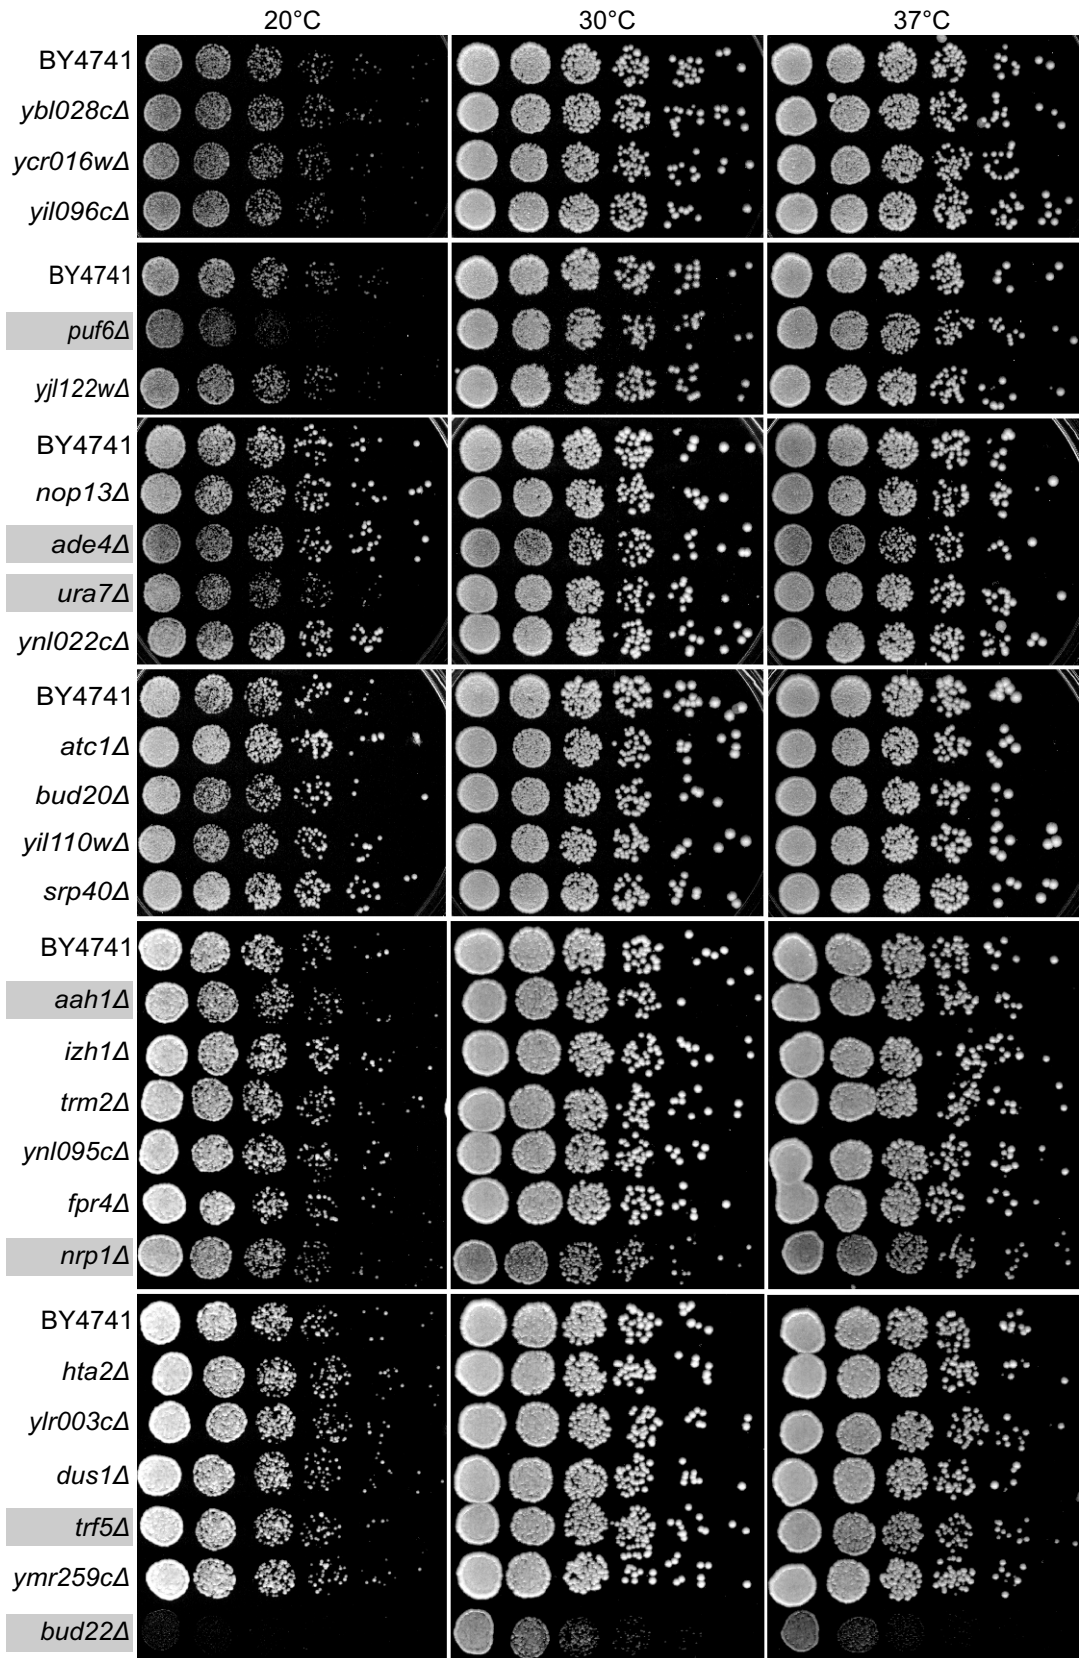

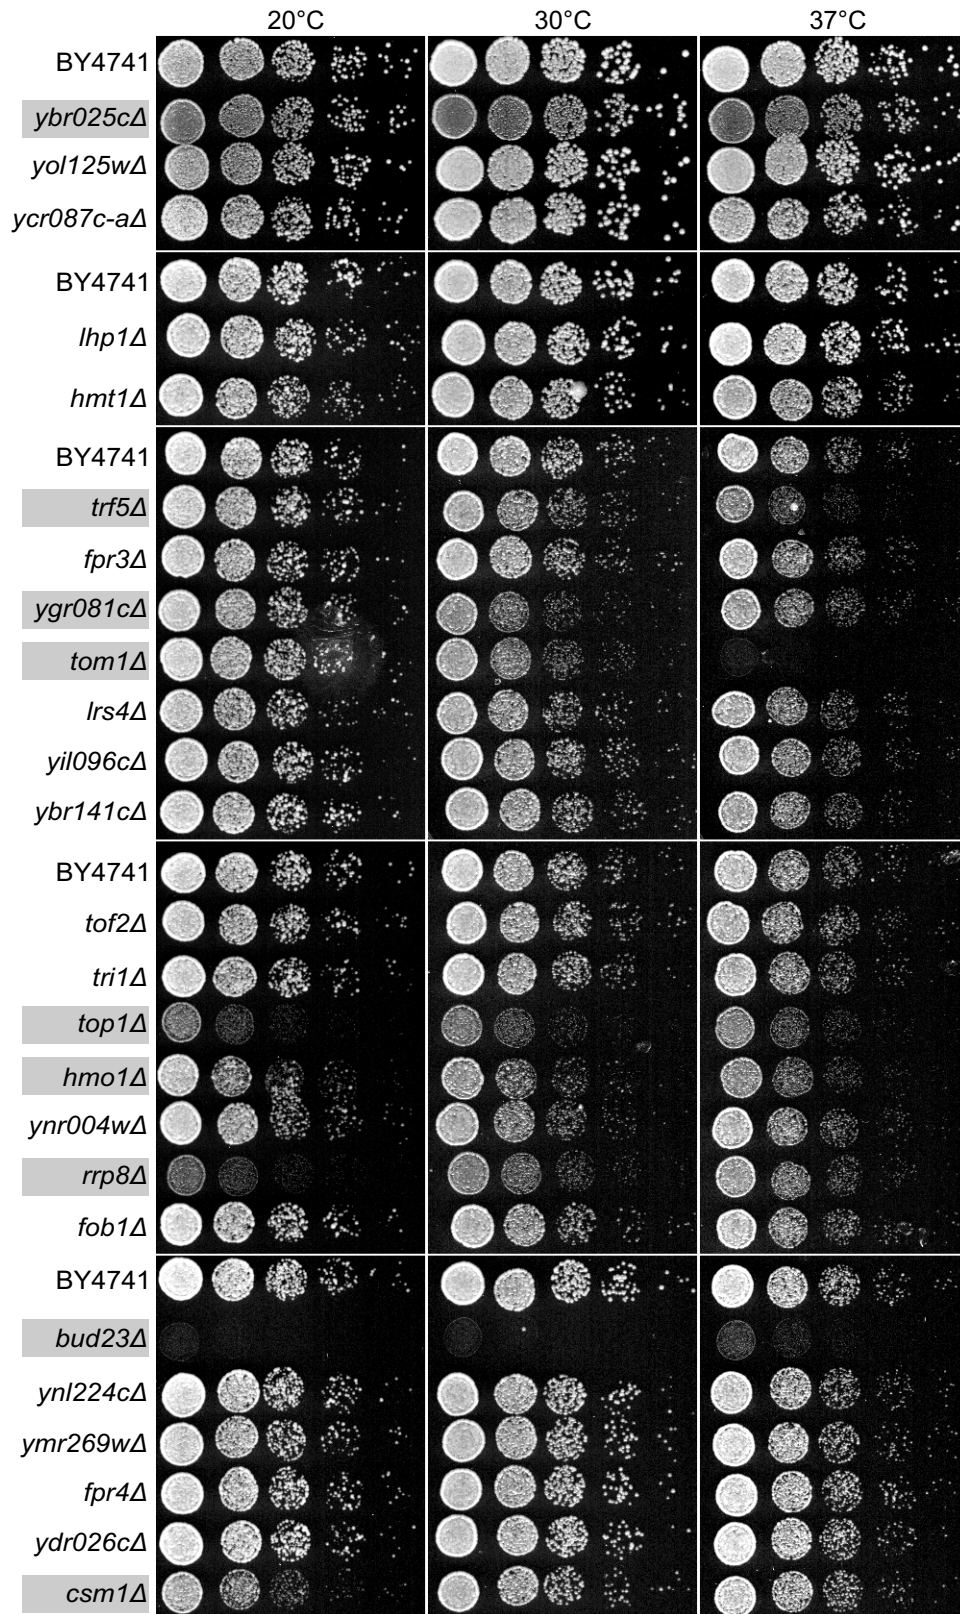

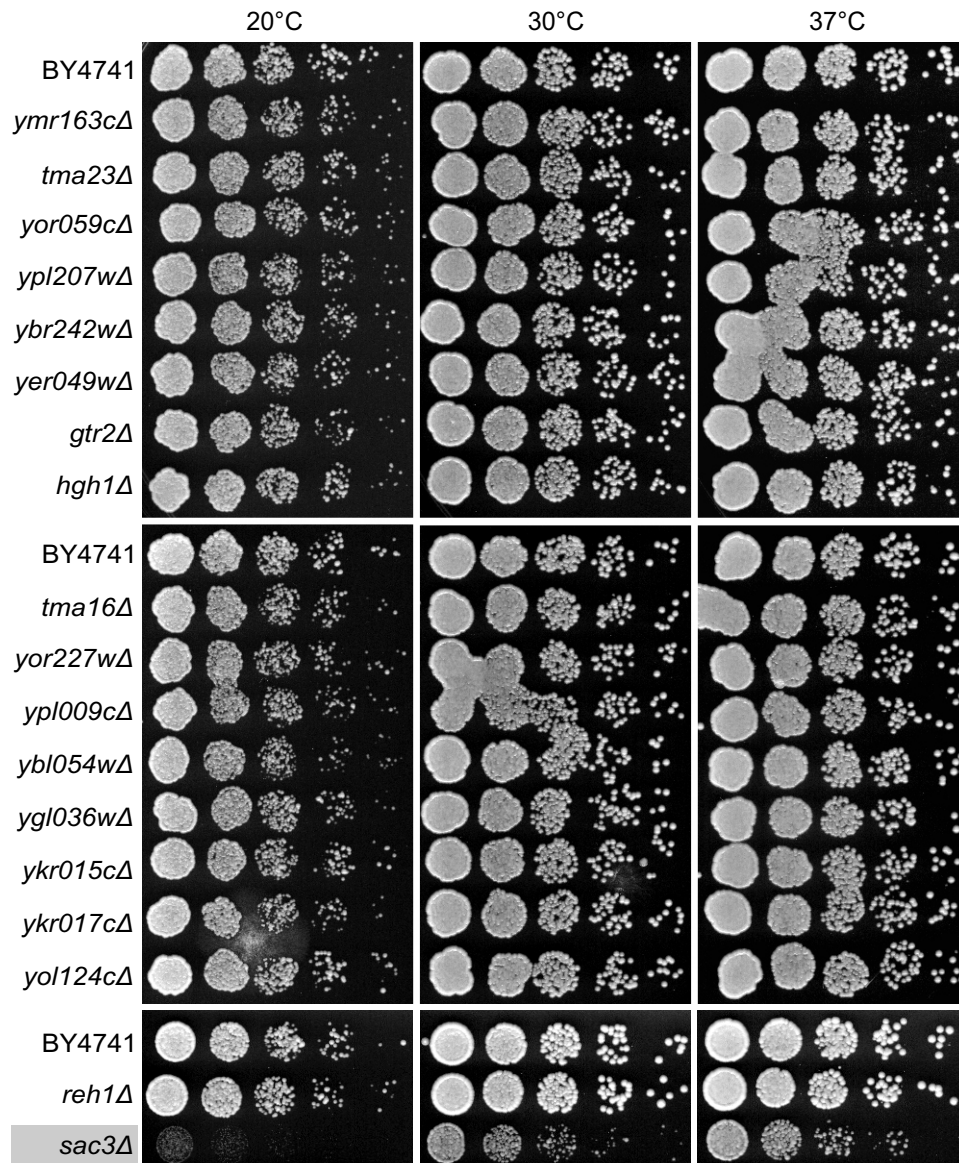

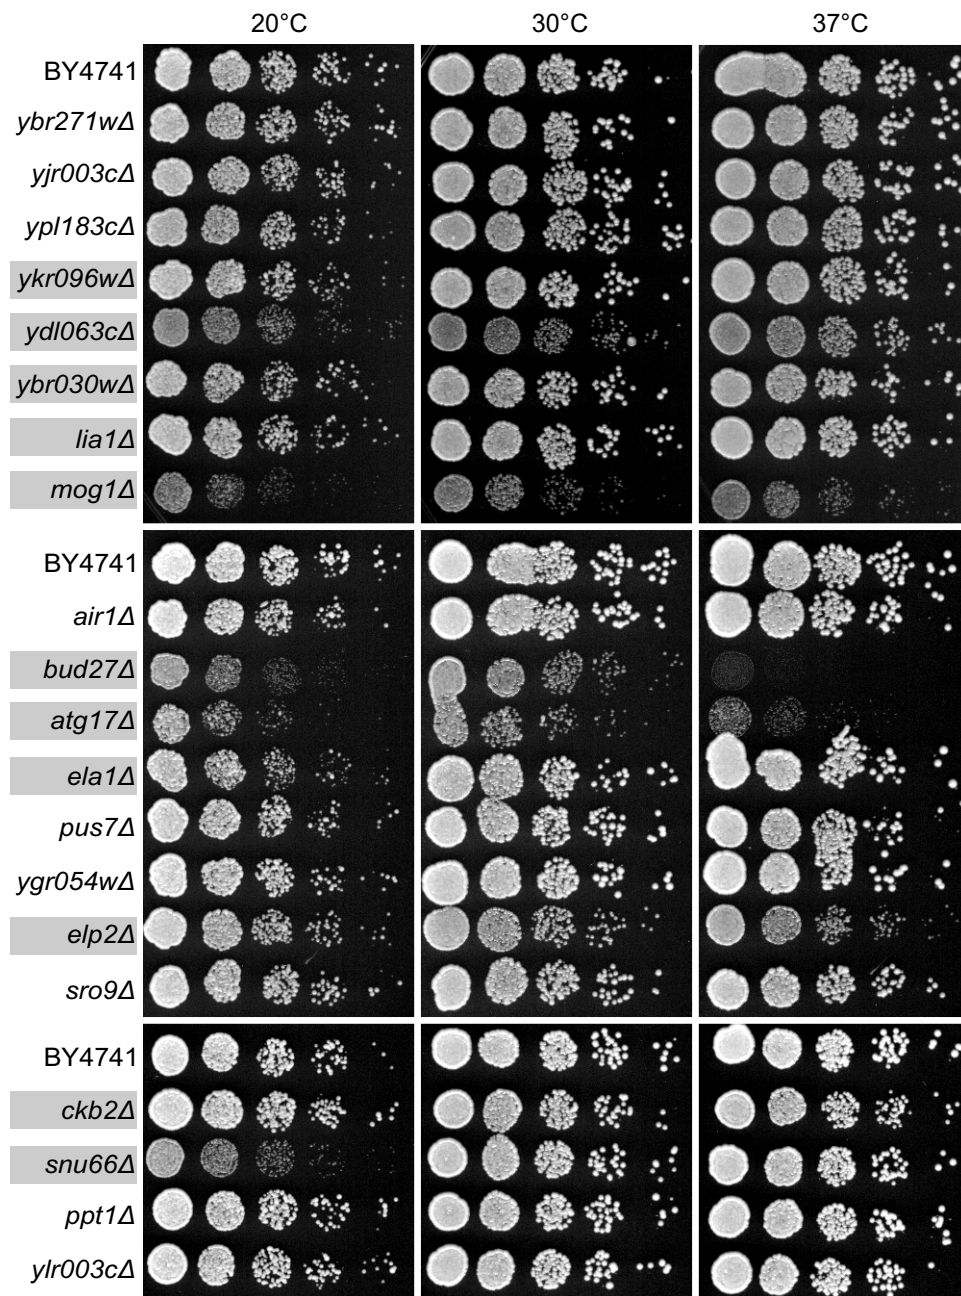

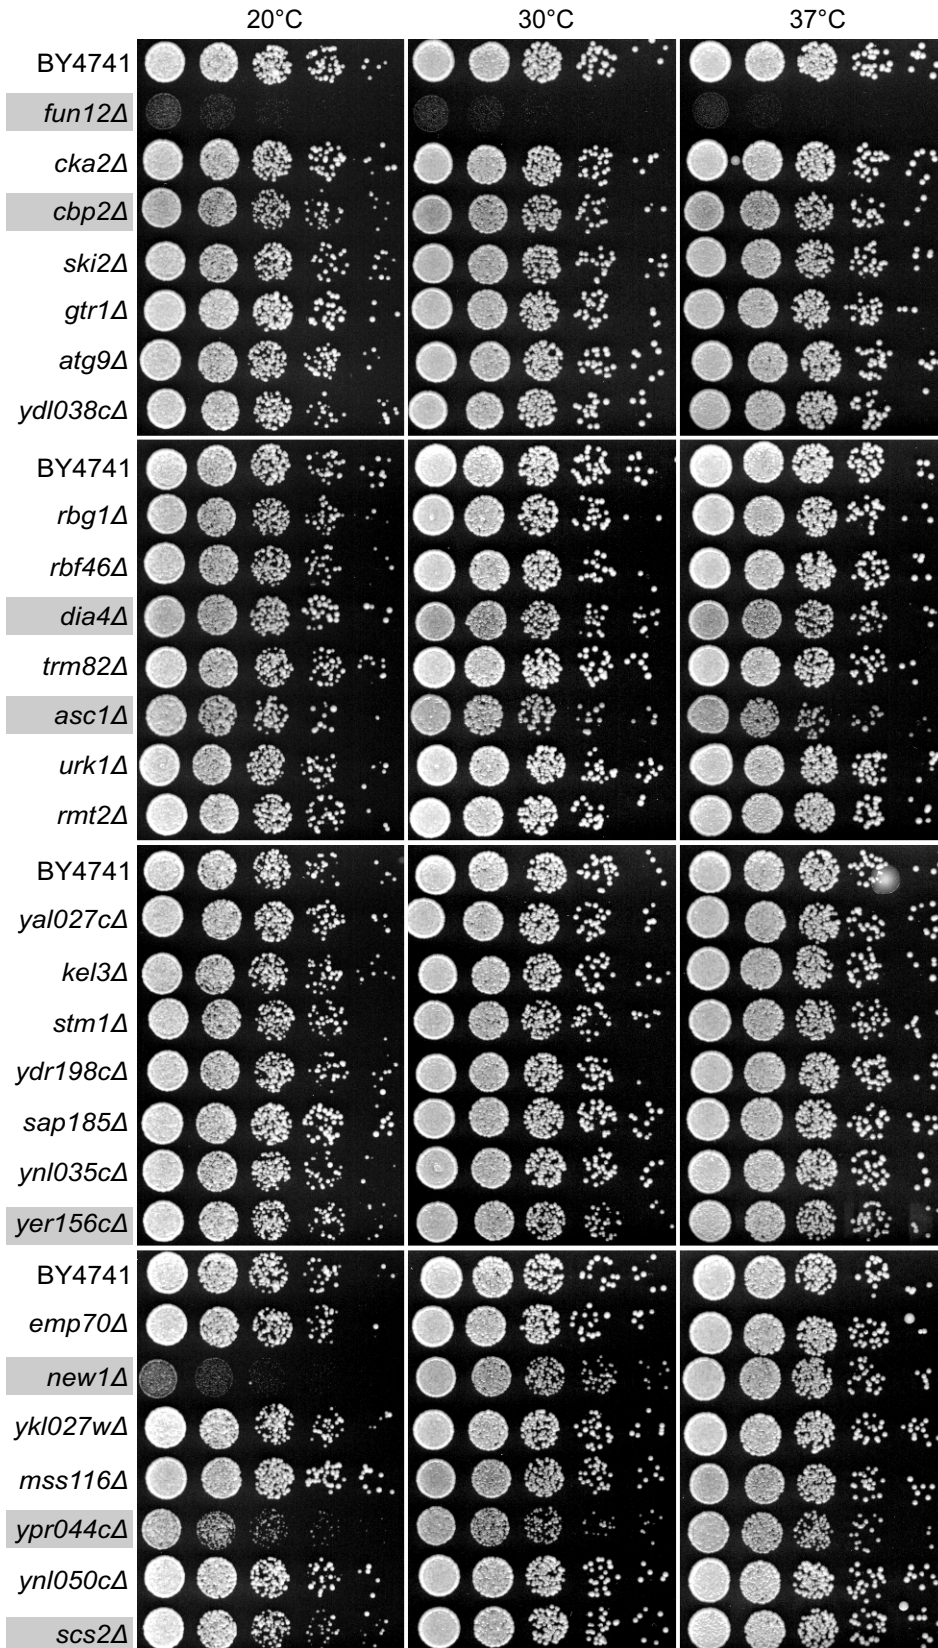



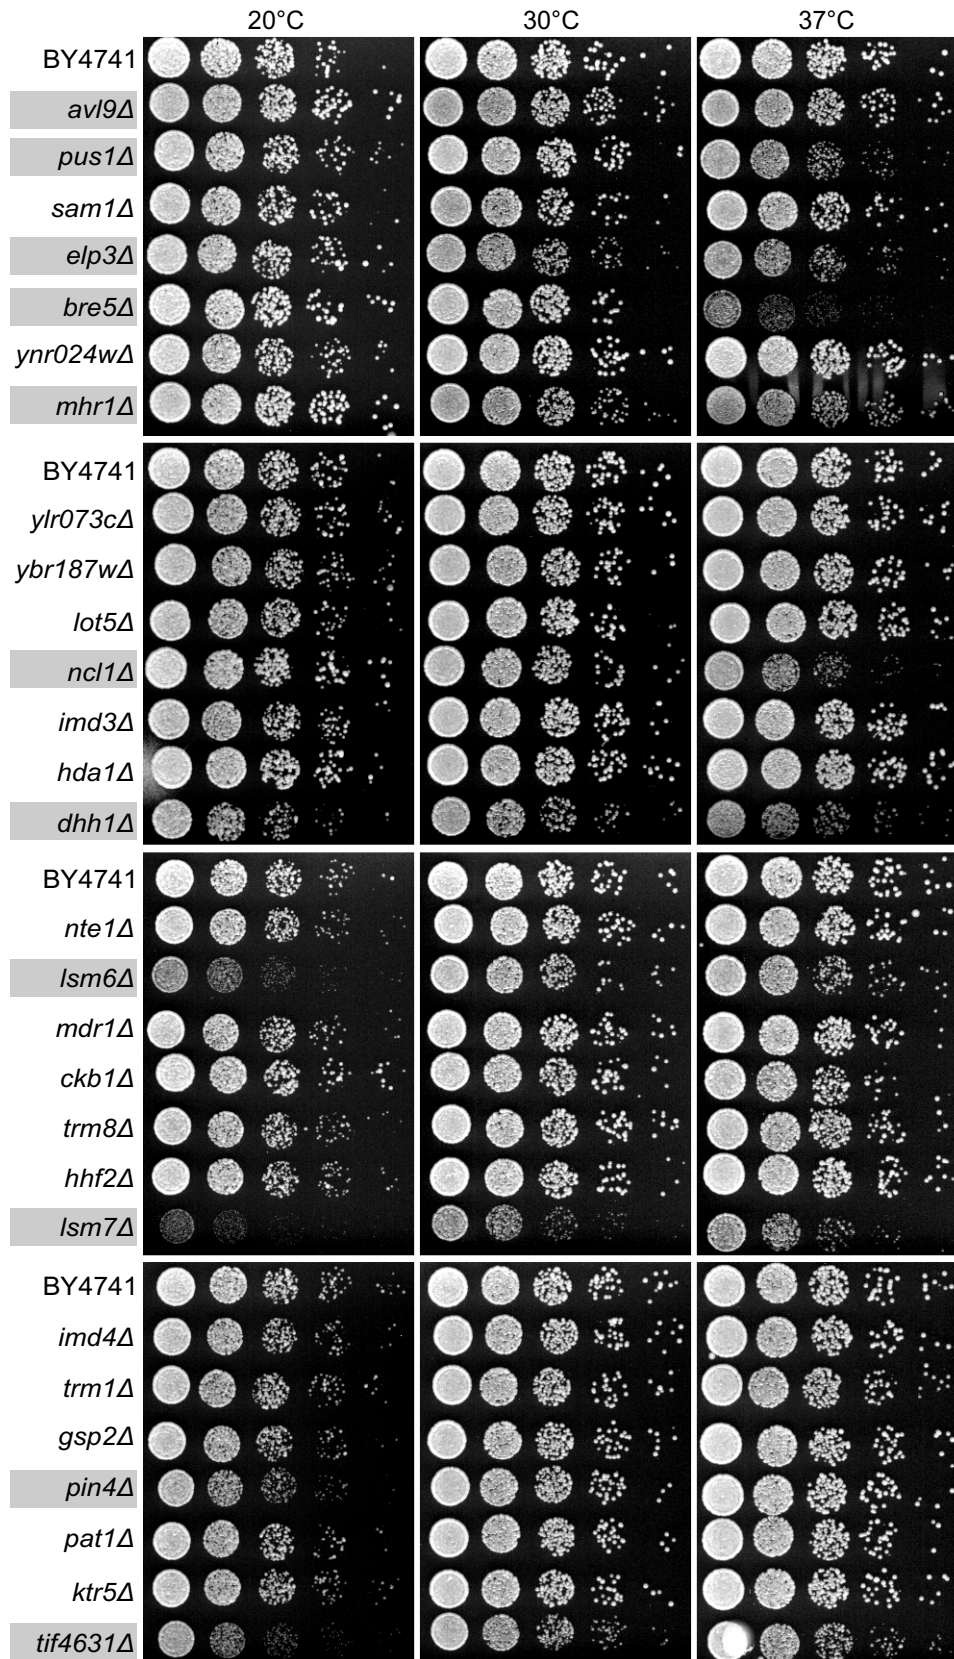

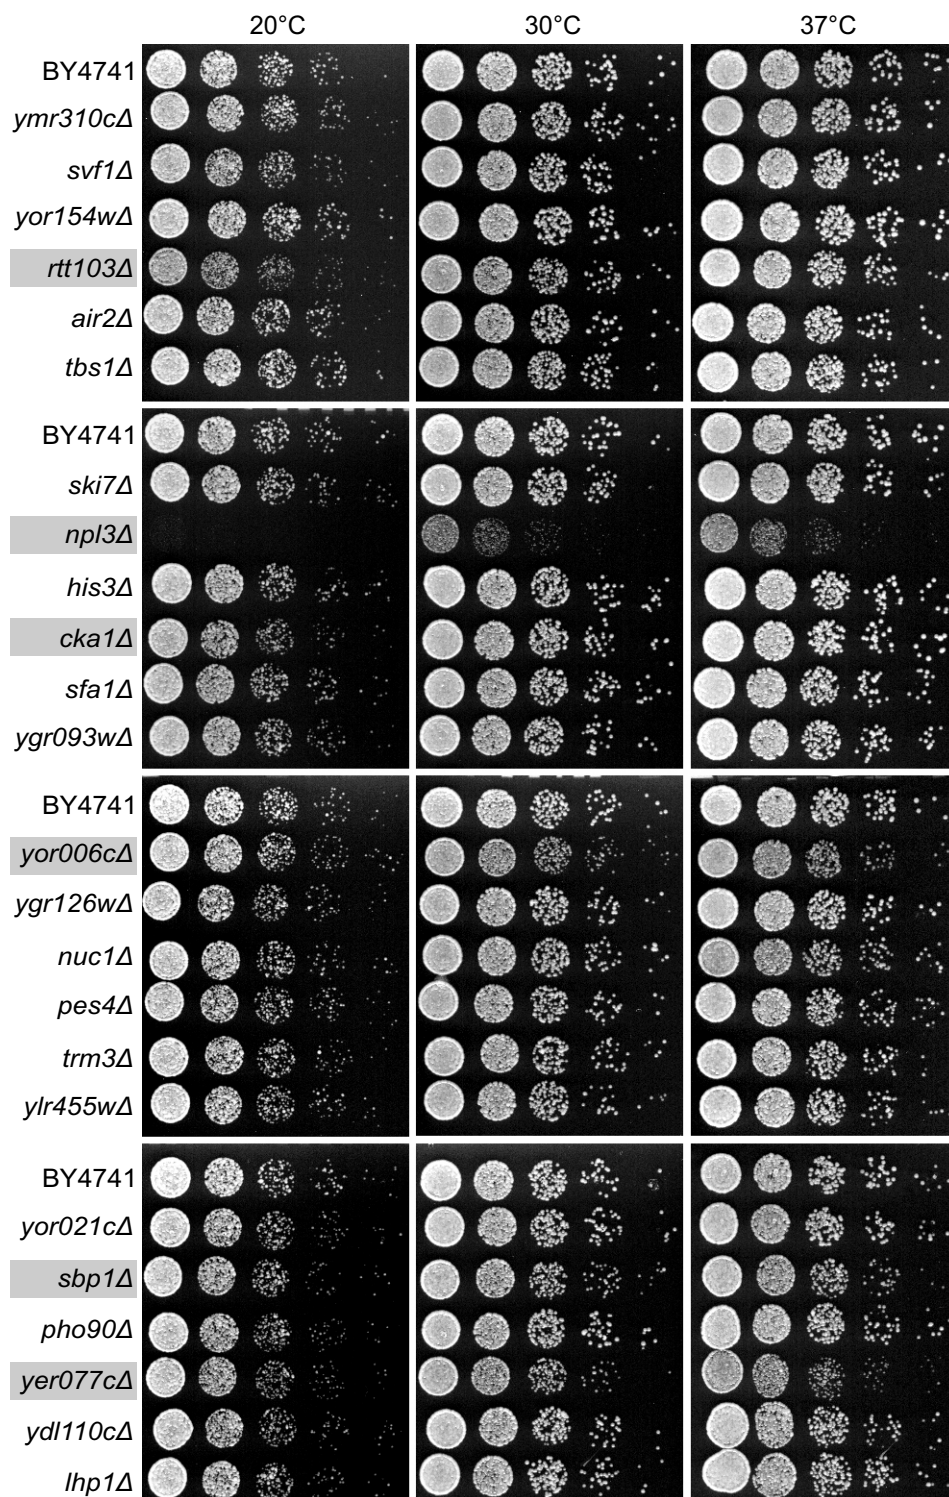

Supplement: pbio.1000213.s001.pdf [file pbio.1000213.s001.pdf]
